# Supplementary material
Source: PubMed Central journal article supplement (PMC6644746)
Supplement: ao8b01726_si_001.pdf [file ao8b01726_si_001.pdf]

# Flexible optical amplifier for visible light communications based in organic-inorganic hybrids

*Ana Bastos<sup>1,2</sup>, Barry McKenna<sup>3</sup>, Mário Lima<sup>2</sup>, Paulo S. André<sup>4</sup>, Luís D. Carlos<sup>1</sup>, Rachel C. Evans<sup>5</sup> and Rute A. S. Ferreira<sup>1,\*</sup>*

<sup>1</sup>Department of Physics, CICECO - Aveiro Institute of Materials, University of Aveiro, Campus Universitário de Santiago, 3810-193 Aveiro, Portugal

<sup>2</sup>Department of Electronics, Telecommunications and Informatics, Instituto de Telecomunicações, University of Aveiro, Campus Universitário de Santiago, 3810-193 Aveiro, Portugal

<sup>3</sup>School of Chemistry, Trinity College Dublin, Dublin 2, Ireland

<sup>4</sup>Instituto de Telecomunicações and Department of Electric and Computer Engineering, Instituto Superior Técnico, Universidade de Lisboa, Av. Rovisco Pais, 1049-001 Lisbon, Portugal

<sup>5</sup>Department of Materials Science & Metallurgy, University of Cambridge, 27 Charles Babbage Road, Cambridge CB3 0FS, U.K.

---

## Supporting Information

## Table and figure captions

**Table S1** Composition, processing method and thickness of PBS-di-ureasils prepared in this study. [PBS-PFP] is the concentration of the stock PBS-PFP solution (in  $\mu\text{M}$  repeat units, r.u.), that is added to the d-UPTES. The weight percent (wt%) of polymer incorporated was estimated from [PBS-PFP] and the resultant mass of the dry CPE-di-ureasil.

**Figure S1.** Ellipsometric parameters  $I_s$  (open circles) and  $I_c$  (open triangles) measured for (a) dU(600)-M; (b) PBS1-M; (c) PBS2-M; (d) dU(600)-F; (e) PBS3-F; (f) PBS4-F; and (g) PBS5-F. The solid lines represent the data best fit.

**Figure S2.** Ellipsometric parameters  $I_s$  (open circles) and  $I_c$  (open triangles) measured in PBS1-M in the regions exposed to UV radiation with energy of (a) 30; (b) 60; (c) 80; (d) 100; (e) 120  $\mu\text{J}\cdot\text{pulse}^{-1}$ . The solid lines represent the data best fit.

**Figure S3.** Ellipsometric parameters  $I_s$  (open circles) and  $I_c$  (open triangles) measured in PBS2-M in the regions exposed to UV radiation with energy of (a) 30; (b) 60; (c) 80; (d) 100; (e) 120  $\mu\text{J}\cdot\text{pulse}^{-1}$ . The solid lines represent the data best fit.

**Figure S4.** Dispersion curves obtained for the channel waveguide regions in PBS1-M.

**Figure S5.** Emission spectra for different stripe lengths in (a) dU(600), (b) PBS1-M.

**Figure S6.** Emission spectra for different stripe lengths PBS1-M in the regions exposed to UV radiation with energy of (a) 30; (b) 60; (c) 80; (d) 100; (e) 120  $\mu\text{J}\cdot\text{pulse}^{-1}$ .

**Figure S7.** Emission spectra for different stripe lengths PBS2-M in the regions exposed to UV radiation with energy of (a) 30; (b) 60; (c) 80; (d) 100; (e) 120  $\mu\text{J}\cdot\text{pulse}^{-1}$ .

**Figure S8.** Integrated emission intensity as function of the stripe length of UV exposed regions in PBS1-M.

**Figure S9.** Spectra at the waveguide output for (a) PBS1-M and (b) PBS2-M.

**Figure S10.** Pulsed signals at the receiver after transmission through the waveguides in (a) PBS1-M and (b) PBS2-M.

**Figure S11.** Gain calculated for each channel in PBS1-M.

## Synthesis and processing

**Table S1** Composition, processing method and thickness of PBS-di-ureasils prepared in this study. [PBS-PFP] is the concentration of the stock PBS-PFP solution (in  $\mu\text{M}$  repeat units, r.u.), that is added to the d-UPTES. The weight percent (wt%) of polymer incorporated was estimated from [PBS-PFP] and the resultant mass of the dry CPE-di-ureasil.

| Sample designation | [PBS-PFP]<br>( $\mu\text{M}$ r.u.) | PBS-FTP weight (%)   | Processing method | Spin rate (rpm) | Thickness (mm)        |
|--------------------|------------------------------------|----------------------|-------------------|-----------------|-----------------------|
| dU(600)-M          | 0                                  | 0                    | Monolith          | -               | 2.9                   |
| PBS1-M             | 4.7                                | $1.2 \times 10^{-3}$ |                   | -               | 2.7                   |
| PBS2-M             | 98.4                               | $1.2 \times 10^{-2}$ |                   | -               | 3.2                   |
| dU(600)-F          | 0                                  | 0                    | Film              | 10 000          | $0.82 \times 10^{-5}$ |
| PBS3-F             | 90                                 | $2.5 \times 10^{-2}$ |                   | 8 000           | $3.28 \times 10^{-5}$ |
| PBS4-F             | 790                                | 0.2                  |                   | 8 000           | $1.62 \times 10^{-5}$ |
| PBS5-F             | 790                                | 0.2                  |                   | 10 000          | $1.8 \times 10^{-5}$  |

## Spectroscopic ellipsometry

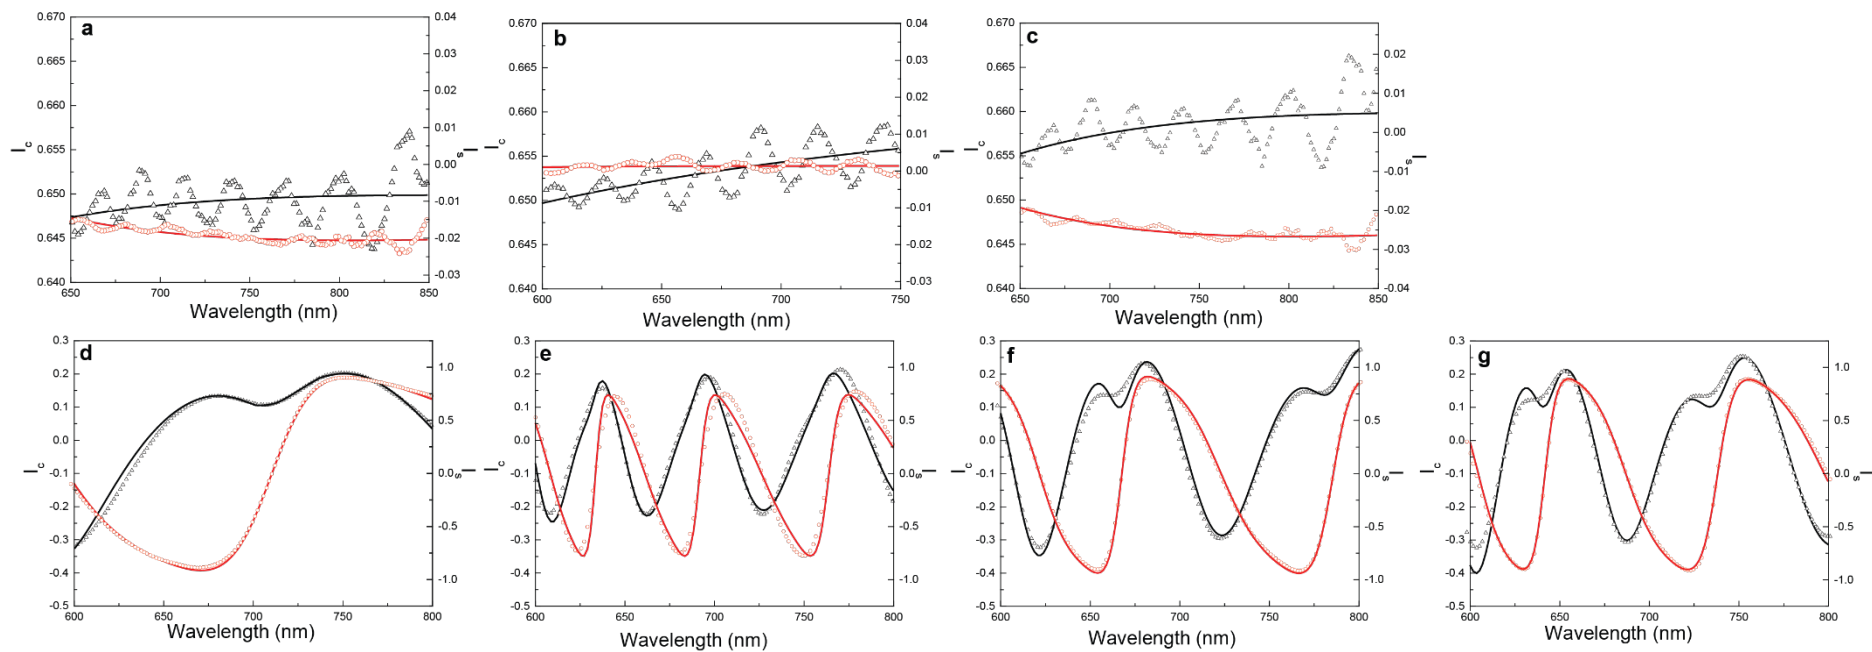

**Figure S1.** Ellipsometric parameters  $I_s$  (open circles) and  $I_c$  (open triangles) measured for (a) dU(600)-M; (b) PBS1-M; (c) PBS2-M; (d) dU(600)-F; (e) PBS3-F; (f) PBS4-F; and (g) PBS5-F. The solid lines represent the data best fit.

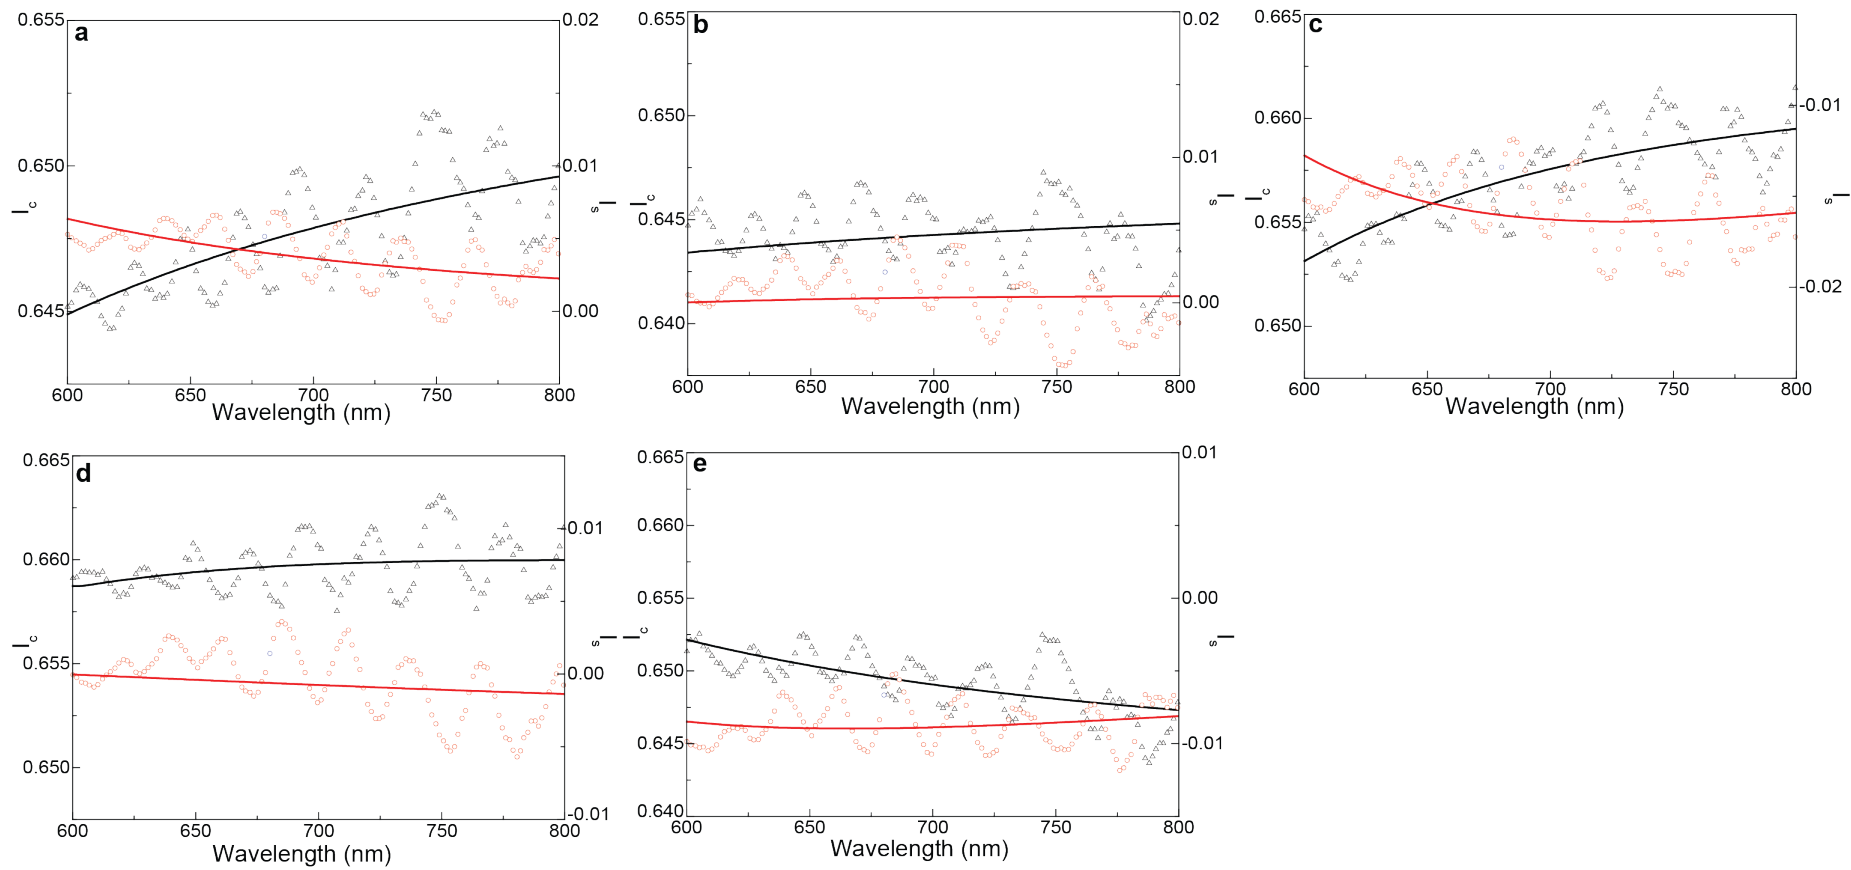

**Figure S2.** Ellipsometric parameters  $I_s$  (open circles) and  $I_c$  (open triangles) measured in PBS1-M in the regions exposed to UV radiation with energy of (a) 30; (b) 60; (c) 80; (d) 100; (e) 120  $\mu\text{J}\cdot\text{pulse}^{-1}$ . The solid lines represent the data best fit.

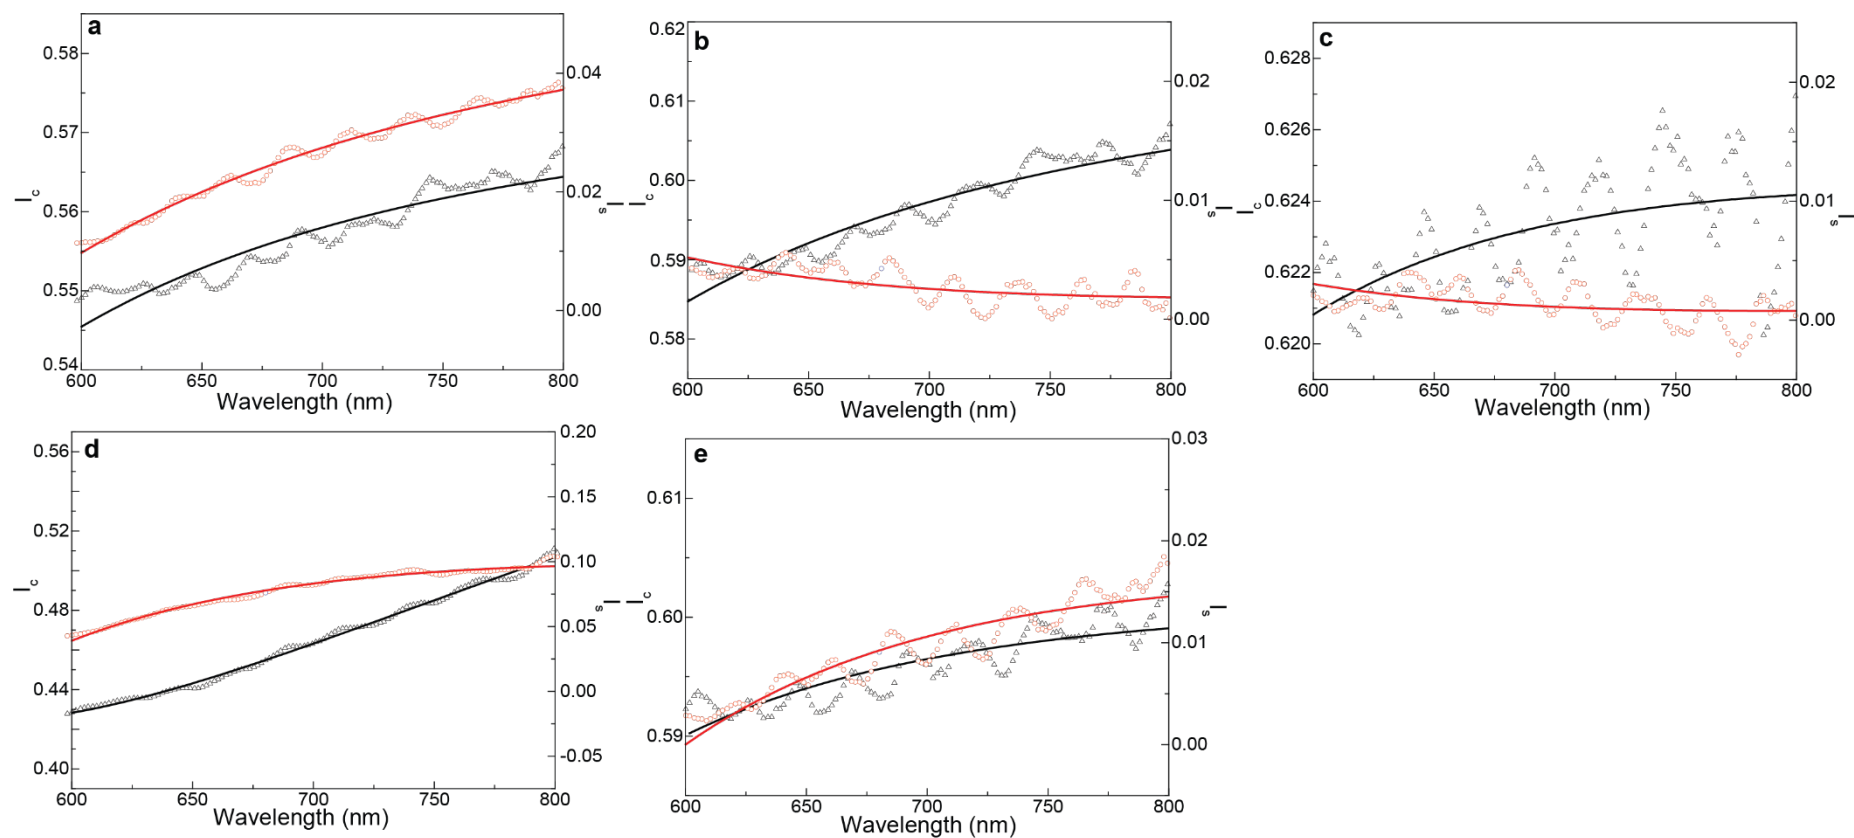

**Figure S3.** Ellipsometric parameters  $I_s$  (open circles) and  $I_c$  (open triangles) measured in PBS2-M in the regions exposed to UV radiation with energy of (a) 30; (b) 60; (c) 80; (d) 100; (e) 120  $\mu\text{J}\cdot\text{pulse}^{-1}$ . The solid lines represent the data best fit.

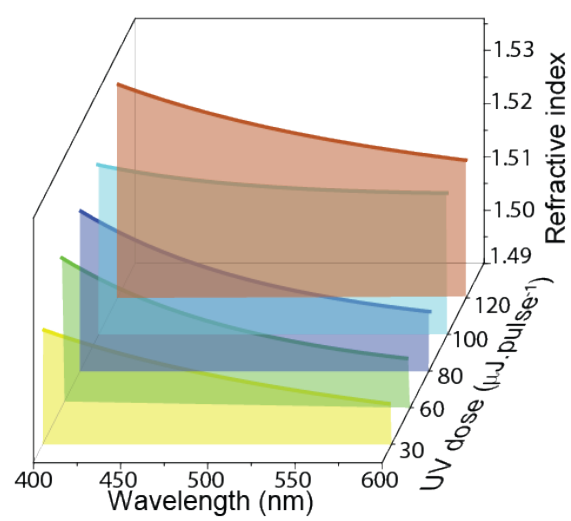

**Figure S4.** Dispersion curves obtained for the channel waveguide regions in PBS1-M.

## Optical measurements

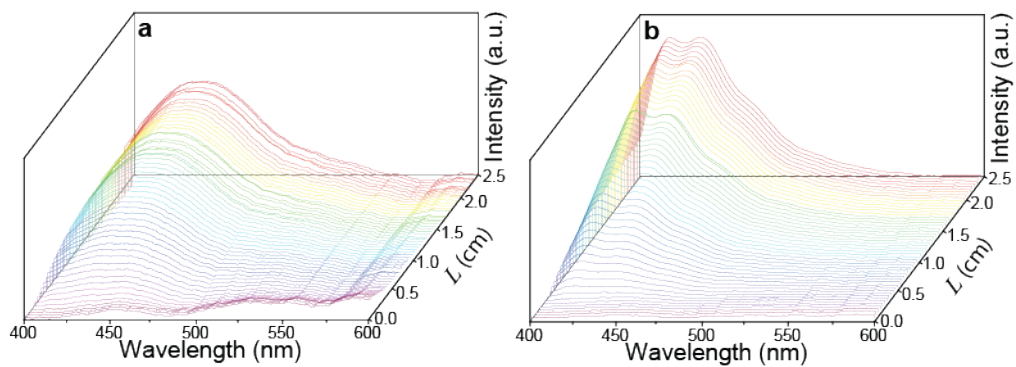

**Figure S5.** Emission spectra for different stripe lengths in (a) dU(600), (b) PBS1-M.

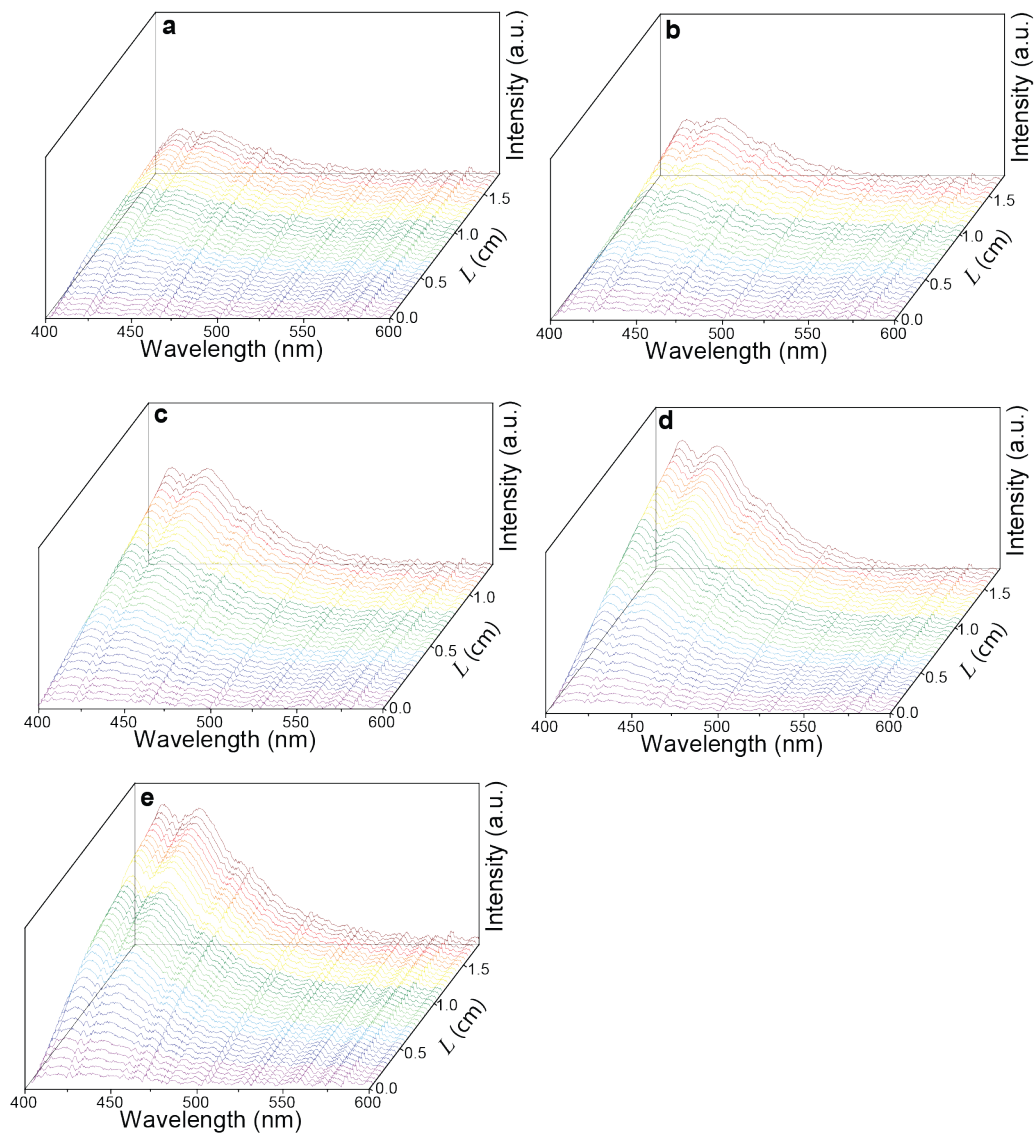

**Figure S6.** Emission spectra for different stripe lengths PBS1-M in the regions exposed to UV radiation with energy of (a) 30; (b) 60; (c) 80; (d) 100; (e) 120  $\mu\text{J}\cdot\text{pulse}^{-1}$ .

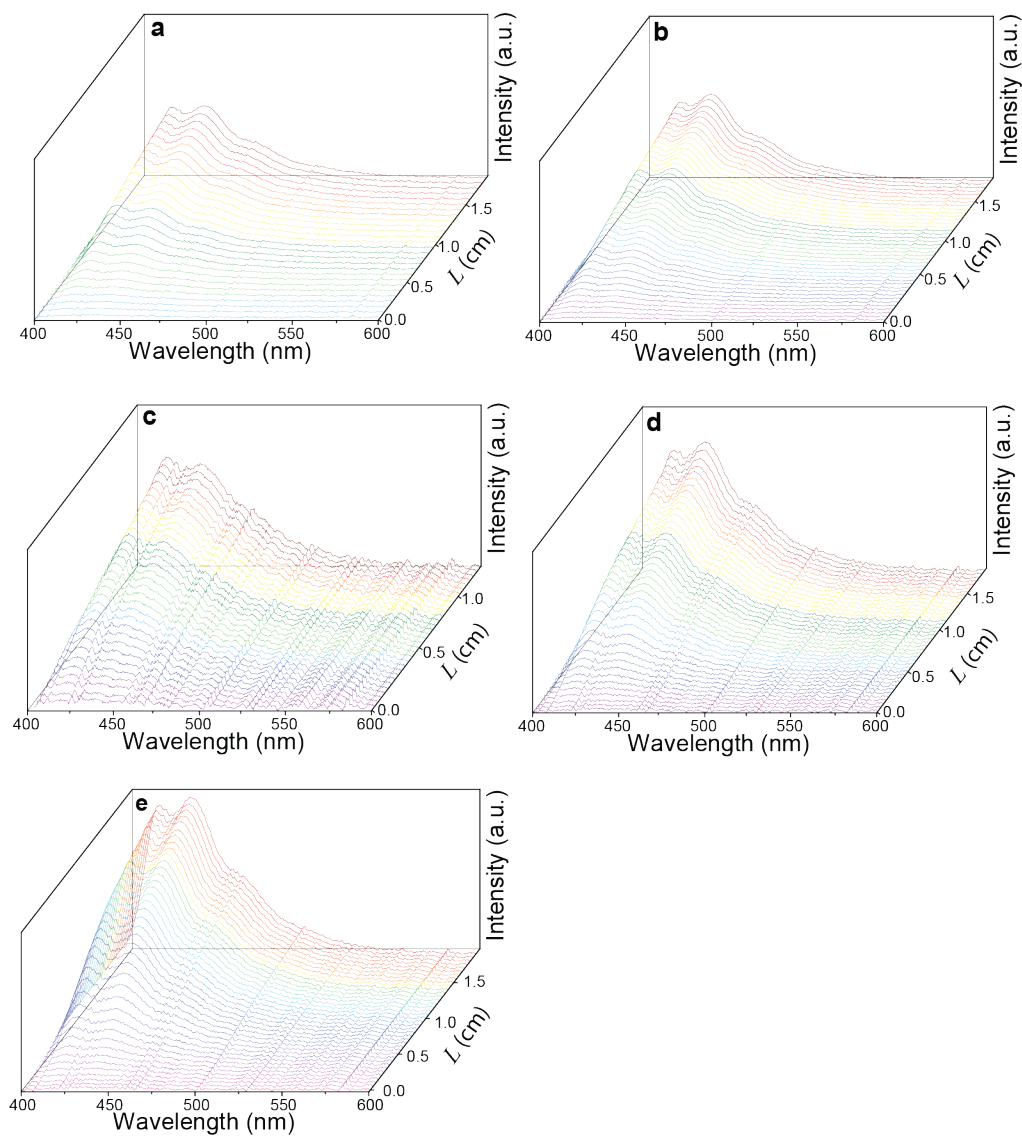

**Figure S7.** Emission spectra for different stripe lengths PBS2-M in the regions exposed to UV radiation with energy of (a) 30; (b) 60; (c) 80; (d) 100; (e) 120  $\mu\text{J}\cdot\text{pulse}^{-1}$ .

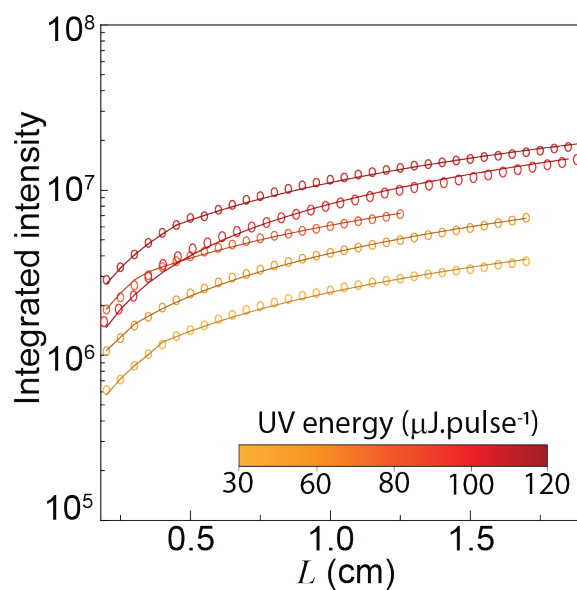

**Figure S8.** Integrated emission intensity as function of the stripe length of UV exposed regions in PBS1-M.

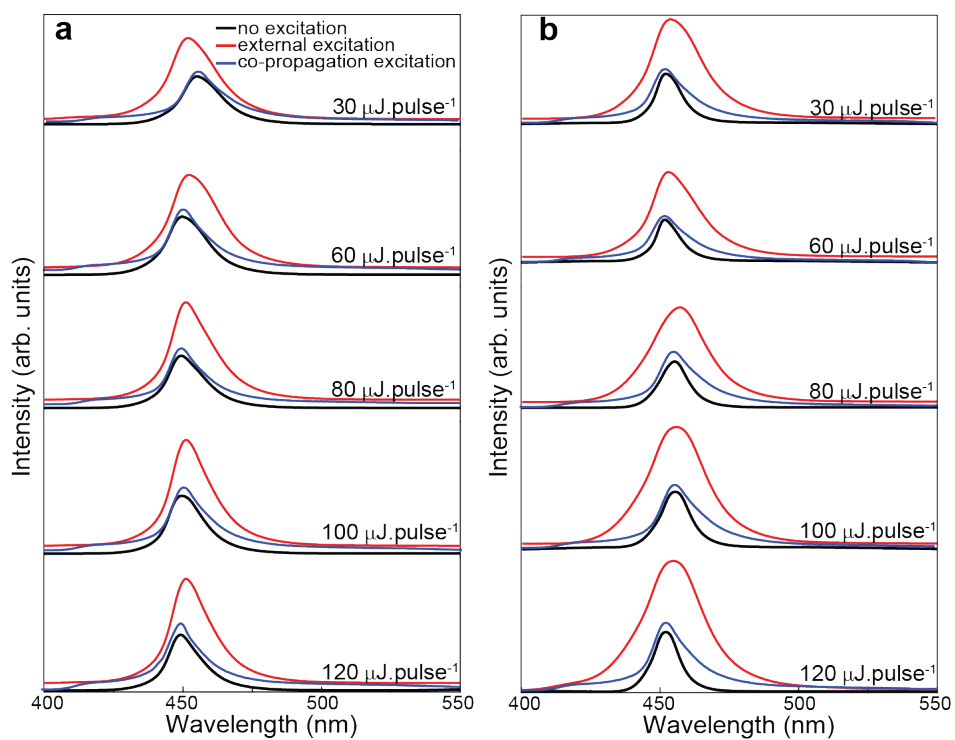

**Figure S9.** Spectra at the waveguide output for (a) PBS1-M and (b) PBS2-M.

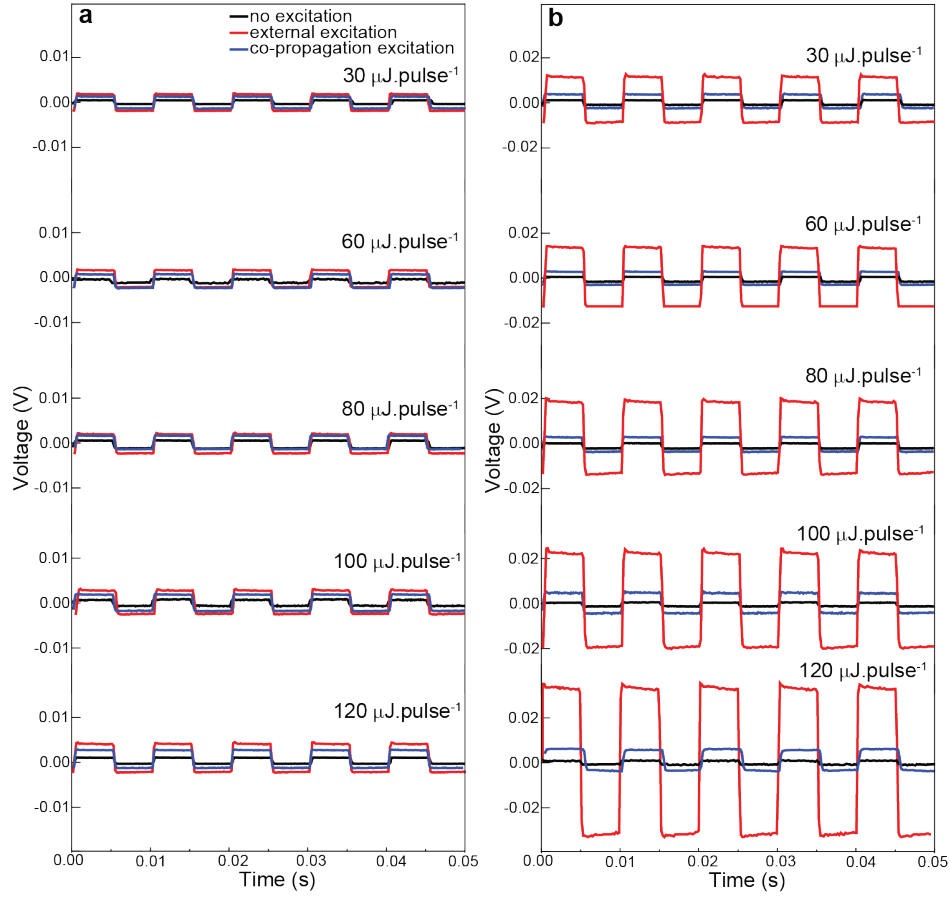

**Figure S10.** Pulsed signals at the receiver after transmission through the waveguides in (a) PBS1-M and (b) PBS2-M.

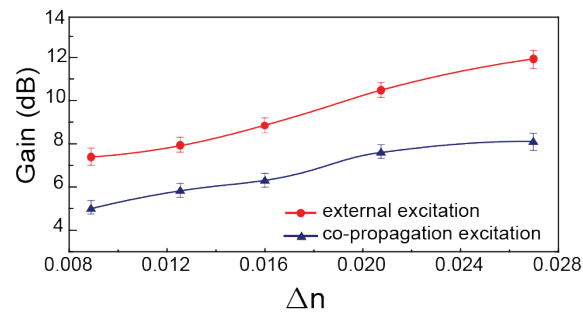

**Figure S11.** Gain calculated for each channel in PBS1-M.
